# Supplementary material for: A daily reconstructed chlorophyll-a dataset in South China Sea from MODIS using OI-SwinUnet
Source: Copernicus journal article supplement (doi:10.5194/essd-2024-6), 2024-02-02
Supplement: Supplementary file [file essd-2024-6-AC2-supplement.pdf]

Dear Reviewer:

Thank you for the comments concerning our manuscript entitled “A daily reconstructed chlorophyll-a dataset in South China Sea from MODIS using OI-SwinUnet” (ID: ESSD-2024-6). Those comments are all valuable and very helpful for revising and improving our paper, as well as the important guiding significance to our researches. We have studied comments carefully and have made correction which we hope meet with approval.

Revised portion are highlighted using the “Track Changes” function in the paper. The main corrections in the paper and the responds to the Reviewer’s comments are as flowing:

Responds to the Reviewers’ comments:

**Reviewer #2:**

### **GENERAL COMMENTS**

- 1. Innovation: The combination of OI and SwinUnet for reconstructing missing chlorophyll-a data is commendable. It addresses a significant gap in marine science research by providing a method to fill in missing satellite data, which is a common problem due to factors like cloud cover, sun glint, and sensor limitations.**

Response: Thanks for this comment. The lack of complete satellite observation data impedes the utilization of satellite data in the domain of oceanic research. Deep learning offers significant potential in the realm of ocean remote sensing by extracting complex features from images using a vast quantity of data. We are developing a deep learning model using the SwinUnet framework to reconstruct sea surface chlorophyll data obtained from remote sensing. Our goal is to provide continuous and complete datasets that are accurate and reliable, which will be valuable for researchers.

- 2. Evaluation: The manuscript does an excellent job of comparing the OI-SwinUnet method against other common reconstruction methods such as DINEOF, OI, and Unet, demonstrating its superiority in handling missing data reconstruction in the South China Sea.**

Response: Thanks for this comment. The current major remote sensing data reconstruction methods can be classified as traditional algorithms, including DINEOF and OI. Recently, researchers have also endeavored to do research on deep learning remote sensing reconstruction models, such as CNN-Unet. This work presents an analysis of the benefits and challenges encountered by DINEOF, OI, and CNN-Unet in the process of reconstructing remote sensing data. We also conduct a comparative evaluation of these methods with our suggested approach, OI-SwinUnet. The findings indicate that OI-SwinUnet is capable of preserving and restoring a greater amount of small- and meso-scale details compared to traditional algorithms. Furthermore, it is better suited than CNN-Unet for reconstructing extensive, high-resolution chlorophyll a concentration products detected by satellites in the

South China Sea.

- 3. Applicability and impact: The study's findings have significant implications for marine science, particularly in understanding the spatial and temporal distribution of chlorophyll-a in the South China Sea. The reconstructed dataset can enhance studies related to marine ecology, biogeochemical cycles, and ocean dynamics.**

Response: Thanks for this comment. It is our expectation that the rebuilt dataset will be useful not only for analyzing the temporal and spatial aspects of chlorophyll distribution at the surface of the South China Sea under long time periods, but also for capturing the phytoplankton outburst events that happen locally or by accident. In the manuscript, we also analyze the differences between reconstructed datasets and satellite observation datasets in the application of monitoring the ecological effects of mesoscale eddies. Since the reconstructed dataset is characterized by spatiotemporal integrity, it is also particularly suitable for the changing pattern of surface chlorophyll over the full life cycle of eddies, which will help us to have a more comprehensive understanding of the ecological effects of mesoscale eddies.

#### **SPECIFIC COMMENTS**

- 1. I would recommend revising the title of the manuscript by adding “the” before “South China Sea”.**

Response: Thanks for this comment. We have revised the title by adding “the” before “South China Sea”.

- 2. Introduction: The introduction provides a solid rationale for the study, situating it well within the current state of literature. However, it would benefit from a more detailed discussion of recent advances in data reconstruction techniques, particularly those employing machine learning and deep learning methods beyond the marine sciences, to highlight the novel contribution of OI-SwinUnet.**

Response: Thanks for this useful comments. In the revised manuscript, we discuss recent developments in two reconstruction approaches, OI and DINEOF (Line: 56-85).

“The OI algorithm leverages the conservative nature of marine elements and takes into account the spatial distribution characteristics of each element. It interpolates the unevenly distributed data to the corresponding grid points, resulting in an optimal estimation. This algorithm increases the coverage area and data density, allowing for the simultaneous use of observation data with varying error characteristics. It effectively addresses the issue of sparse spatial distribution of marine data. The optimal interpolation method has gained global recognition since the 1980s and has been adopted by the U.S. National Meteorological Center (NMC) and the European Centre for Medium-Range Weather Forecasts (ECMWF) for assimilation analysis and numerical prediction (Shaw 1986). The method is extensively employed in the marine domain to reconstruct historical datasets of sea surface temperature (SST), in situ measurements, and sea level anomaly (SLA) datasets. Currently, it is the most often used data

assimilation method in the field of marine meteorology. The assumption made by "OI" is that the datasets are independent in terms of space and time. However, it fails to adequately consider the spatial and temporal correlation of the data. The suboptimal computational efficiency of the optimal interpolation approach is also a constraining factor in its implementation.

DINEOF is a data reconstruction technique that relies on the use of Empirical Orthogonal Function (EOF). It possesses the benefit of internal adaptive correlation without requiring any predetermined values for variables. The cross-correction set is implemented to facilitate the optimal reduction of truncation and estimation errors when constructing the EOF by accounting for default values. This method not only addresses missing data and eliminates noise from the data image, but also produces a dynamically adjusted image that accurately represents the overall condition of the data and its temporal development trend. This is achieved by utilizing the most significant modes obtained through optimal truncation (Alvera-Azarate, Barth and Rixen 2005). Due to the fact that the initial modes in the DINEOF method, which are derived from the entire target dataset decomposed by EOF, represent changes that occur over a period of more than six months, the reconstruction of multi-year time scale large data volume satellite remote sensing datasets using the DINEOF method focuses primarily on capturing temporal and spatial large-scale information. It disregards the small-scale information from a few local observation points. Therefore, using the interpolated target ocean dataset with missing measurements generated by the DINEOF method is not suitable for studying temporal small-scale processes, such as local weather-scale phenomena.”

We also present recent developments in deep learning models that combine CNNs and attention gates for chlorophyll product reconstruction in nearshore marine environments (Line: 88-93).

“Unet is a compact convolutional neural network architecture that includes an encoder-decoder framework, which involves downsampling and upsampling operations. Additionally, Unet incorporates Attention Gates (AGs) inside its network structure. By training Unet with AGs, the background regions in the image are suppressed while the salient features in the data-missing regions are highlighted. This leads to an improvement in the sensitivity of the model and the accuracy of reconstruction.”

In the final section of the Introduction, we address the issues encountered by current data reconstruction techniques and propose a novel OI-SwinUnet scheme (Line: 116-122).

“This paper aims to address the existing challenges and research gaps in traditional reconstruction methods and CNN-based reconstruction models. It focuses on studying the mechanism of chlorophyll in multi-scale spatio-temporal changes in the South China Sea (SCS), including weather-scale. To achieve effective filling of missing data in remotely sensed data products, we propose a novel approach called the OI-SwinUnet method. This method combines the techniques of optimal interpolation (OI) and SwinUnet, and utilizes a multi-scale optimal interpolation, quadratic revision of transformer-based U-type coding and decoding network.”

### Newly Added References

- Alvera-Azarate, A., Barth, A., & Rixen, M. (2005). Reconstruction of Incomplete Satellite SST Data Sets Using Empirical Orthogonal Functions: Application to the Adriatic Sea Surface Temperature. *Ocean Modelling*, 9, 325-346
- Shaw, B.D. (1986). *Data Assimilation Scientific Documentation Research Manual*. England: European Centre for Medium-Range Weather Forecasts

**3. Method: The detailed explanation of the OI-SwinUnet model, including its components and the rationale behind its design, provides clarity and demonstrates the robustness of the approach. However, more details on the specific configurations of the SwinUnet architecture used in this study (e.g., number of layers, heads in multi-head self-attention) could further enhance this section.**

Response: Thanks for this useful comment. In the revised manuscript, we have rewritten the SwinUnet part of Method. It is described in three parts: "SwinUnet framework - Swin Transformer block - (S)W-MSA module", and the detailed configurations of SwinUnet are added, such as the frequency of upsampling/downsampling, the size of the feature map for each stage, the size of the window of the (S) window size of W-MSA, the length of the vector of tokens, and so on.

(1) "SwinUnet framework" (Line 233-259): The Unet architecture serves as the fundamental framework for SwinUnet. The model comprises four primary components, namely, the encoder, decoder, bottleneck, and skip connections (Figure 3). Given that the original SwinUnet model requires 3 channels of input data, we encountered disparity because our preprocessed data comprised 66 channels. To address this discrepancy, we introduce an additional convolutional layer prior to the patch partition layer. This new layer serves the purpose of transforming the data from its original 66 channels to the required 3 channels. In order to transform the image into an embedding sequence, we divide the entire input tensor into patches of size  $4 \times 4$  that do not overlap. These patches are then flattened in the direction of the channels. By employing this partitioning technique, the dimensions of the feature map transform from  $[H, W, 3]$  to  $[H/4, W/4, 48]$ . Next, the linear embedding layer linearly transforms the feature dimension of each pixel from 48 to  $C$ . This results in a change in the shape of the feature map from  $[H/4, W/4, 48]$  to  $[H/4, W/4, C]$ . Within the encoder, the patches are inputted into the Swin Transformer block to facilitate learning, while the feature size and resolution stay constant. Simultaneously, the patch merging layer will decrease the quantity of feature maps by a factor of 2 through downsampling, while doubling the feature dimension compared to its original size. This step will be iterated three times in the encoder. The symmetric decoder, which relies on the Swin Transformer block, serves as the counterpart to the encoder. The deep features that were recovered are enlarged in the decoder using a patch expanding layer. The patch expanding layer transforms the feature maps of adjacent dimensions into higher resolution feature maps ( $2 \times$  up-sampling) and reduces the feature dimensions by half. In order to prevent the failure of convergence in a deep Swin Transformer block, the bottleneck is constructed using only two SW-MSA modules. This construction ensures that the feature size and resolution stay unchanged. Like UNet, skip connections are employed to integrate multiscale information from the encoder with up-sampled features. Shallow and deep features are linked together to reduce the

loss of spatial information caused by downsampling. Ultimately, the feature map's resolution is increased four times by utilizing the final patch expanding layer, resulting in a restoration to the original input resolution. Afterwards, a linear projection layer is used to generate pixelwise predictions using the upsampled features.

(2) “Swin Transformer block” (Line 260-268): The fundamental element of SwinUnet is the Swin Transformer block (Figure 4). The construction of the Swin Transformer block is based on the concept of the shift window. The Swin Transformer block is composed of two normalization layers (LNs), a multihead self-attention module, residual connections, and a multilayer perceptron (MLP) layer with a GELU nonlinear activation function (Xiao et al. 2020). The use of the window-based multihead self-attention module (W-MSA) and the shift window-based multihead self-attention module (SW-MSA) is observed in two consecutive transformer blocks (Figure 4). The formula for the block can be represented as follows.

(3) “(S)W-MSA module” (Line 269-275): The W-MSA module initially partitions the feature map into several windows based on the specified  $M \times M$  dimensions. It subsequently computes the self-attention within each window independently. Nevertheless, the W-MSA module lacks the capability to transfer information between windows. Therefore, it becomes imperative to implement SW-MSA, which relies on shifted windows, in order to address this limitation. The SW-MSA module, together with the W-MSA module in the Swin Transformer block, forms a two-tier structure through which information can be passed through neighboring windows.

(4) “configurations of SwinUnet” (Line 281-295): The configuration of SwinUnet is shown in Table 1. The downsampling (upsampling) rate refers to the frequency at which upsampling and downsampling are carried out by the patch merging layer and patch expanding layer. After resampling, the output feature maps for each stage have heights and widths of  $[560 \times 560, 280 \times 280, 140 \times 140, 70 \times 70]$  accordingly. The window size for performing MSA and SW-MSA operations is set to  $7 \times 7$ . As a result, each stage contains a total of  $[6400, 1600, 400, 100]$  windows. The hidden size refers to the length of the vector associated with each token, which represents the feature dimension of the feature map. Upon traversing the linear embedding layer, the feature dimension of the feature map in Unet's stage 1 is augmented to 96, and thereafter doubles in size in the following stages. The depth refers to the quantity of W-MSA and SW-MSA modules present in the Swin Transformer block. Specifically, in the first three stages, the Swin Transformer block is composed of a double layer structure consisting of one W-MSA module and one SW-MSA module. In stage 4, often known as the bottleneck, there is only one SW-MSA module. The MLP size refers to the number of nodes in the first fully-connected layer of the MLP module, which is four times the hidden size. The "heads" parameter represents the number of nodes in both the W-MSA and SW-MSA in the Swin Transformer block.

Table 1 Detailed architecture configurations of SwinUnet

|         | Downsampling/Upsampling Rate<br>(Output Feature Map Size) | Window size  | Window Numbers | Hidden Size | Depth | MLP Size | Heads |
|---------|-----------------------------------------------------------|--------------|----------------|-------------|-------|----------|-------|
| Stage 1 | 4                                                         | $7 \times 7$ | 6400           | 96          | 2     | 384      | 3     |

|         |                 |     |      |     |   |      |    |
|---------|-----------------|-----|------|-----|---|------|----|
|         | (560×560)       |     |      |     |   |      |    |
| Stage 2 | 8<br>(280×280)  | 7×7 | 1600 | 192 | 2 | 768  | 6  |
| Stage 3 | 16<br>(140×140) | 7×7 | 400  | 384 | 2 | 1536 | 12 |
| Stage 4 | 32<br>(70×70)   | 7×7 | 100  | 768 | 1 | 3072 | 24 |

**4. Results: The results convincingly demonstrate the superiority of the OI-SwinUnet method over traditional reconstruction methods like DINEOF, OI, and Unet through comprehensive statistical evaluation. While the statistical metrics employed are appropriate, incorporating a discussion on the practical significance of these statistical improvements in real-world applications would add value. Moreover, presenting case studies or specific instances where the reconstructed data reveal new insights about marine ecological processes could illustrate the method's impact more vividly.**

Response: Thanks for this useful comment. We compared the effectiveness of OI-SwinUnet and the other three methods in filling in the gaps in the time series using two typical pixels (highly turbid water and clean water) in the revised manuscript. The results demonstrated that OI-SwinUnet could reasonably reproduce the inter-annual and seasonal variation patterns of chlorophyll in both the highly turbid water and the clean water. (Line: 362-375)

“Two representative pixels were sampled from the Pearl River Estuary in the northern part of the South China Sea and the central part of the South China Sea. These pixels were chosen to represent highly turbid water and clean water, respectively (red triangles in Figure 10). The purpose was to compare the performance of OI-SwinUnet and three other methods in terms of filling gaps in time series data. The results indicate that our proposed OI-SwinUnet demonstrates strong resilience to localized extremes, typically outliers. Within the clean water region, the OI-SwinUnet, DINEOF, and OI methods are capable of analyzing the dynamic patterns of the chlorophyll time series. However, the Unet method performs slightly less accurately, as it tends to underestimate chlorophyll values in most time intervals. This discrepancy is particularly evident in time intervals where satellite observations are consistently absent. In areas with high levels of turbid water, the OI-SwinUnet method performs similarly to the DINEOF method during periods of consecutive high chlorophyll levels. Figure 9 demonstrates that DINEOF is more successful in reconstructing high chlorophyll levels. This suggests that the method can effectively fill in the gaps in the time series data, allowing for reasonable patterns of interannual variation in chlorophyll-a to be observed.”

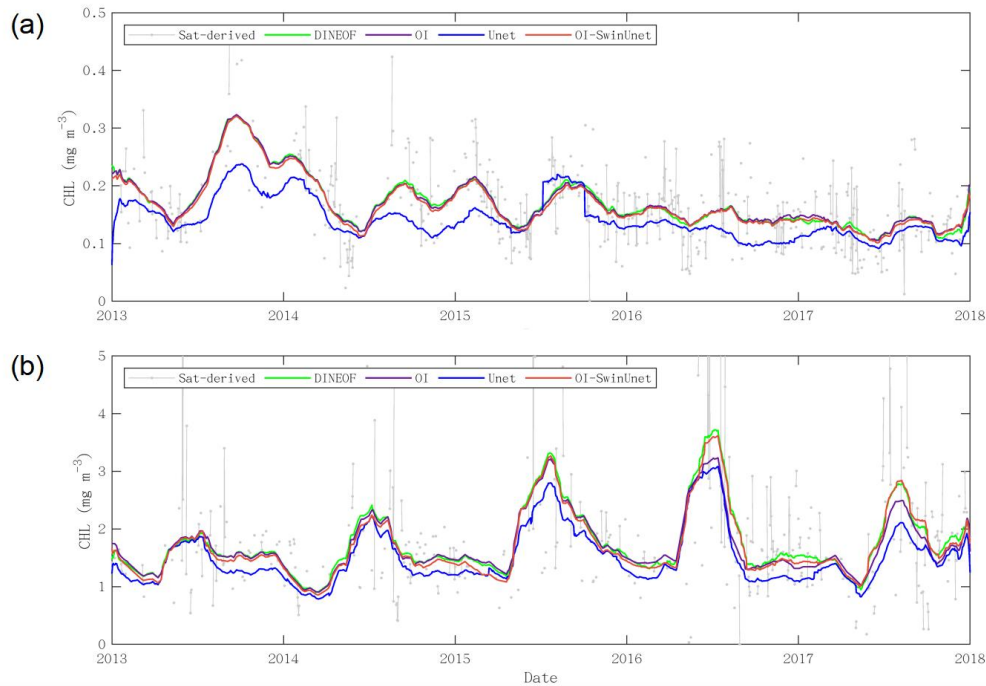

**Figure 9: Gap-filled time series of two represented pixels (a) clear water, and (b) high turbid water using DINEOF , OI, Unet and OI-SwinUnet methods**

**5. Validation and metrics: The use of various statistical metrics (RMSD, R2, bias) for model evaluation is appropriate. Additionally, assessing the model's performance across different missing data patterns (MCAR, MAR, MNAR) adds to the robustness of the findings. Future work could include comparisons with in-situ measurements if available, to further validate the reconstructed chlorophyll-a concentrations against ground truth data, and discussing how these advancements can influence our understanding of phytoplankton dynamics in response to climate change.**

Response: Thanks for this comment. The purpose of designing experiments with various missing data patterns and rates is to assess how the performance of the reconstruction model is affected by growing data sparsity and the complexity of the missing scenario. The findings indicate that OI-SwinUnet is capable of learning the characteristics at various spatial scales, even when the satellite observation data is intentionally concealed. This is achieved by utilizing the knowledge from both before and after time, resulting in the precise reconstruction of the areas that were previously missing. In situ measurements are crucial for validating models by providing accurate data. Regrettably, we did not gather any in situ measurements of chlorophyll from 2013 to 2017. The reviewer's comments serve as a valuable reference for our future endeavors. In our upcoming work, we will diligently gather numerous field observations to further assess and authenticate the OI-SwinUnet model.

**6. Discussion on limitations and future work: While the manuscript highlights the advantages of the OI-SwinUnet method, a more detailed discussion on its limitations and potentials for improvement would be valuable. For instance, how does the method**

**perform in extremely turbid waters or under conditions of very high cloud cover? Also, exploring the potential of incorporating additional satellite sensors or data sources could be mentioned as a direction for future research.**

Response: Thanks for this useful comment. Through the selection of various pixels and the analysis of the time series of reconstruction results from different methods, we have discovered that while OI-SwinUnet generally performs well, its reconstruction performance is slightly inferior to that of DINEOF when dealing with highly turbid and chlorophyll-rich waters. This is an important aspect to consider in our future work. Furthermore, we have contemplated integrating additional sensors or data sources, such as the chlorophyll products obtained from Sentinel-3A/B OLCI. The OI module may integrate data from several sensors to create a combined product from multiple satellites. This merged product is then passed to the SwinUnet module for reconstruction. Undoubtedly, there are still pending tasks that need to be completed prior to integrating additional satellite products, including doing study on the coherence of those products.

**7. Implication: The manuscript could benefit from a more detailed discussion on how the reconstructed dataset can be used to advance marine science research, beyond the examples provided. Potential applications in climate change studies, marine resource management, and oceanic carbon cycle research could be explored.**

Response: Thanks for this comment. We have included a potential application to the conclusion section such as the reconstruction of datasets for the purpose of advancing carbon cycle research in the final portion of the study.

Line 679-689: “In the future, we can employ reconstructed data to further enhance marine scientific study. The real-time, large-scale, long time-series, and stable observation data obtained from satellite remote sensing are highly advantageous for monitoring and assessing ocean carbon fluxes and stocks, as well as studying the ocean carbon cycle. Additionally, these data serve as a motivating factor for advancing the application of remote sensing of ocean color in the study of the ocean carbon cycle. Currently, there are significant uncertainties and challenges in estimating the ocean carbon sink based on actual measurements. The OI-SwinUnet deep learning reconstruction model and high-precision remote sensing reconstruction products are crucial in studying the spatial and temporal distribution pattern of carbon parameters in response to global changes. They also help reduce uncertainties in estimating carbon fluxes and stocks.”

We appreciate for Editors/Reviewers’ warm work earnestly, and hope that the correction will meet with approval.

Once again, thank you very much for your comments and suggestions.

Yours sincerely,

Shilin Tang



Corresponding author:

Name: Shilin Tang

E-mail: [sltang@scsio.ac.cn](mailto:sltang@scsio.ac.cn)
